# Supplementary material
Source: PubMed Central journal article supplement (PMC3430992)

Table S1

| <b>Species</b>                 | <b>Site</b> | $S_{c,pal}/S, \%$ | $S_{c,spn}/S, \%$ |
|--------------------------------|-------------|-------------------|-------------------|
| <i>Acacia longifolia</i>       | HRHN        | 86.0              | 14.0              |
| <i>Acacia myrtifolia</i>       | HRLN        | 75.9              | 24.1              |
| <i>Acacia suaveolens</i>       | HRLN        | 78.0              | 22.0              |
| <i>Angophora hispida</i>       | HRLN        | 55.7              | 44.3              |
| <i>Astrotrichia floccosa</i>   | HRHN        | 50.0              | 50.0              |
| <i>Banksia aemula</i>          | LRLN        | 50.0              | 50.0              |
| <i>Banksia integrifolia</i>    | MQ          | 68.0              | 32.0              |
| <i>Banksia marginata</i>       | HRLN        | 75.0              | 25.0              |
| <i>Banksia oblongifolia</i>    | HRLN        | 65.0              | 37.5              |
| <i>Banksia robur</i>           | MQ          | 62.5              | 44.9              |
| <i>Banksia serrata</i>         | MQ          | 56.1              | 43.9              |
| <i>Banksia serrata</i>         | HRLN        | 60.3              | 39.7              |
| <i>Banksia spinulosa</i>       | LRHN        | 61.0              | 59.0              |
| <i>Eriostemon australasius</i> | HRLN        | 81.0              | 19.0              |
| <i>Eucalyptus fibrosa</i>      | LRHN        | 80.0              | 20.0              |
| <i>Eucalyptus sclerophylla</i> | LRLN        | 70.0              | 30.0              |
| <i>Eucalyptus umbra</i>        | HRHN        | 80.1              | 19.9              |
| <i>Grevillea speciosa</i>      | HRLN        | 52.5              | 47.5              |
| <i>Hakea dactyloides</i>       | HRLN        | 90.0              | 10.0              |
| <i>Lambertia formosa</i>       | HRHN        | 60.0              | 40.0              |
| <i>Lambertia formosa</i>       | HRLN        | 60.0              | 40.0              |
| <i>Macadamia ternifolia</i>    | MQ          | 50.0              | 50.0              |
| <i>Macrozamia communis</i>     | HRHN        | 50.0              | 50.0              |
| <i>Macrozamia spiralis</i>     | LRHN        | 50.5              | 49.5              |
| <i>Notolea longifolia</i>      | HRHN        | 50.1              | 49.9              |
| <i>Persoonia lanceolata</i>    | HRLN        | 58.5              | 41.5              |
| <i>Persoonia laurina</i>       | LRLN        | 51.5              | 48.5              |
| <i>Persoonia laurina</i>       | LRHN        | 51.0              | 49.0              |
| <i>Persoonia levis</i>         | HRLN        | 50.3              | 49.7              |
| <i>Pittosporum undulatum</i>   | HRHN        | 57.9              | 42.1              |
| <i>Polyscias sambucifolia</i>  | HRHN        | 85.0              | 15.0              |
| <i>Syncarpia glomulifera</i>   | HRHN        | 58.5              | 41.5              |
| <i>Synoum glandulosum</i>      | HRHN        | 59.6              | 40.4              |
| <i>Xylomelum pyriforme</i>     | HRHN        | 75.5              | 24.5              |

<sup>1</sup>HRHN- higher rain, high nutrients, MQ- Macquarie University campus, HRLN – higher rain, low nutrients, LRHN – lower rain, high nutrients, LRLN – lower rain, low nutrients. Site presentation is as in table 2.

Fig. S1

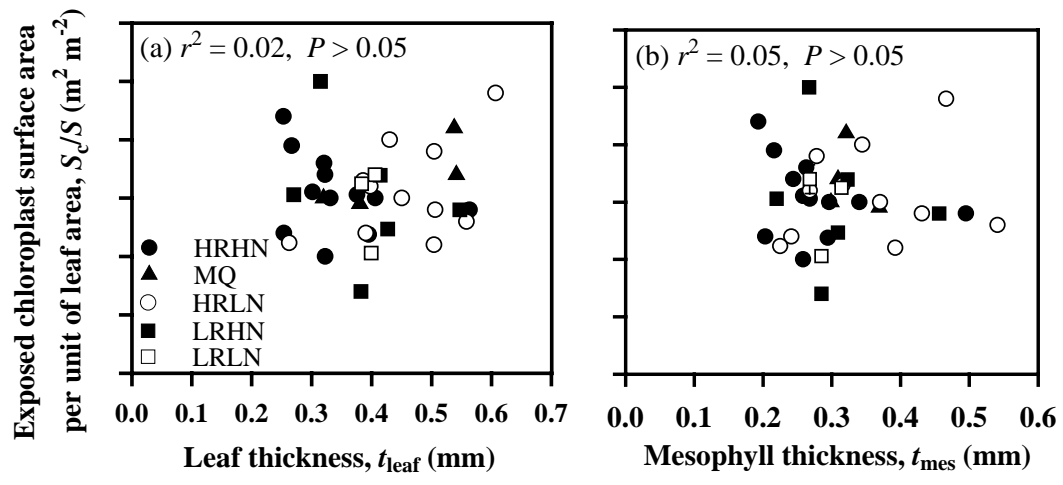

Supplement: supp_ers171_00079061_file001.pdf [file supp_ers171_00079061_file001.pdf]
